# Supplementary material for: Pharmaceutical companies and healthcare providers: Going beyond the gift – An explorative review
Source: PubMed Central journal article supplement (PMC5802853; doi:10.1371/journal.pone.0191856), 2018-02-07
Supplement: pone.0191856.s002.pdf [file pone.0191856.s002.pdf]

**Table 2. Inclusion and exclusion criteria.**

|                         | <b>Inclusion Criteria</b>                                                                                                                                                                                                                                           | <b>Exclusion criteria</b>                                                                                                                                                                                                                                                                                                                               |
|-------------------------|---------------------------------------------------------------------------------------------------------------------------------------------------------------------------------------------------------------------------------------------------------------------|---------------------------------------------------------------------------------------------------------------------------------------------------------------------------------------------------------------------------------------------------------------------------------------------------------------------------------------------------------|
| <b>Database</b>         | <ul style="list-style-type: none"> <li>- Search terms (See Table 1 for the search terms in PubMed and EBSCO)</li> <li>- Year of publication between January 2000 and October 31<sup>st</sup>, 2016</li> <li>- Language: English</li> <li>- Peer-reviewed</li> </ul> | N/A                                                                                                                                                                                                                                                                                                                                                     |
| <b>Title / Abstract</b> | <p>The abstract or title of each article had to include a combination of the following keywords: pharmaceutical companies, healthcare providers, interaction, and effects, or variations to the preceding nouns.</p>                                                | <ul style="list-style-type: none"> <li>- Explicitly mention only unilateral types of interaction or no clear distinction.</li> <li>- Explicitly mention a different aim than investigating an effect of interaction.</li> <li>- Non-empirical study.</li> <li>- Non- quantitative study.</li> <li>- Commentaries, reviews, opinion articles.</li> </ul> |
| <b>Full-texts</b>       | <p>The article empirically investigates the effect of bilateral interaction between pharmaceutical companies and healthcare providers.</p>                                                                                                                          | <ul style="list-style-type: none"> <li>- Non-empirical studies.</li> <li>- Non-quantitative studies.</li> <li>- Studies on unilateral interaction or no clear distinction.</li> <li>- Other stakeholders.</li> <li>- Studies that only described the prevalence.</li> <li>- Studies that describes no interaction.</li> </ul>                           |
