# Supplementary material for: Pharmaceutical companies and healthcare providers: Going beyond the gift – An explorative review
Source: PubMed Central journal article supplement (PMC5802853; doi:10.1371/journal.pone.0191856), 2018-02-07
Supplement: pone.0191856.s003.pdf [file pone.0191856.s003.pdf]

Table 3. Characteristics of the selected studies.

| Study, year                           | Site                              | Population (n)                                       | Type of interaction                   | Type of effect       | Study designs                      | Quality rating score |
|---------------------------------------|-----------------------------------|------------------------------------------------------|---------------------------------------|----------------------|------------------------------------|----------------------|
| <b>Andersen, Kragstrup [46], 2006</b> | Denmark                           | Patients treated (5,439 case, 59,574 control)        | Research-oriented (sponsoring)        | Prescribing behavior | Retrospective cohort study         | 3                    |
| <b>Choudhry, Stelfox [47], 2002</b>   | N-American and European societies | authors of Clinical Practice Guidelines (CPG) (100)  | Research-oriented (CPGs)              | Ethical dilemma      | Cross-sectional survey             | 4                    |
| <b>Fisher and Kalbaugh [54], 2012</b> | United States                     | Informants (63)                                      | Research-oriented (contract research) | Ethical dilemma      | Cross-sectional qualitative study  | 4                    |
| <b>Glass [48], 2004</b>               | United States                     | US physicians participating in phase 3 trial (2,108) | Research-oriented (clinical grant)    | Prescribing behavior | Cross-sectional quantitative study | 4                    |
| <b>Gray [49], 2013</b>                | United States                     | University medical professor (1)                     | Research-oriented (funding)           | Ethical dilemma      | Case study (cross-sectional)       | 5                    |
| <b>Henry, Doran [53], 2005</b>        | Australia                         | medical specialists (823)                            | Research-oriented (sponsoring)        | Ethical dilemma      | Cross-sectional quantitative study | 4                    |
| <b>Myers, Shaheen [50], 2007</b>      | Canada                            | physicians and nurses (229)                          | Research-oriented (sponsoring)        | Research output      | Cross-sectional randomized trial   | 1                    |
| <b>[51], 2016</b>                     | United States                     | Otolaryngologists (1,515)                            | Research-oriented (support)           | Research output      | Quantitative study                 | 4                    |
| <b>Taylor, Huecker [18], 2016</b>     | United States                     | US ophthalmologists (3011)                           | Education-oriented                    | Prescribing behavior | Cross-sectional quantitative study | 4                    |
| <b>Yeh, Franklin [52], 2016</b>       | United States                     | Massachusetts physicians (2444)                      | Education-oriented                    | Prescribing behavior | Cross-sectional quantitative study | 4                    |
